# Supplementary material for: SUMOylated PRC1 controls histone H3.3 deposition and genome integrity of embryonic heterochromatin
Source: PubMed Central journal article supplement — EMBO J. 2020 May 12;39(13):e103697. doi: 10.15252/embj.2019103697 (PMC7327501; doi:10.15252/embj.2019103697), 2020-05-12
Supplement: EMBJ-39-e103697-s001.pdf [file EMBJ-39-e103697-s001.pdf]

# SUMOylated PRC1 controls histone H3.3 deposition and genome integrity of embryonic heterochromatin

Zichuan Liu, Mathieu Tardat, Mark E. Gill, Helene Royo, Raphael Thierry, Evgeniy A. Ozonov and Antoine H.F.M Peters

Contact:

[antoine.peters@fmi.ch](mailto:antoine.peters@fmi.ch)

Fax: +41616973976

ORCID: 0000-0002-0311-1887

Contents: Appendix Figure S1

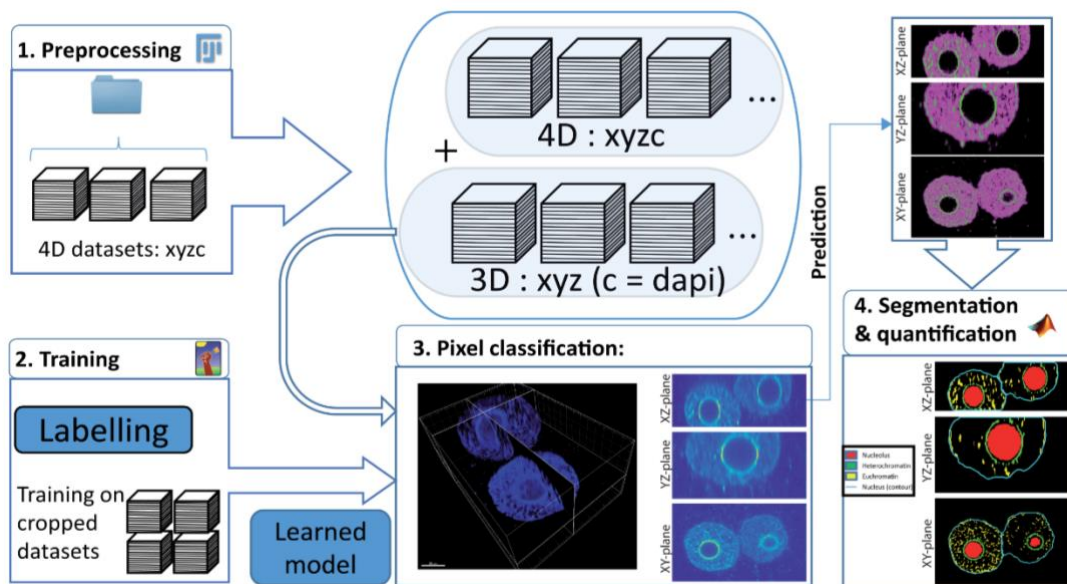

## Appendix Figure S1. Workflow for signal intensity quantification in different nuclear compartments of zygotes.

Scheme showing the image processing workflow to segment and quantify, in three dimensions, signal intensities in the following nuclear compartments of paternal and maternal pronuclei of mouse zygotes (see panel 4): pericentromeric heterochromatin (green), euchromatin (yellow), and prenucleolar bodies (red).
